# Supplementary material
Source: MDPI journal article supplement (https://www.mdpi.com/2071-1050/12/6/2553)
Supplement: s1 [file s1]

## Supplemental Information

# Ecological Suitability of Island Development Based on Ecosystem Service Values, Biocapacity and Ecological Footprint: A Case Study of Pingtan Island, Fujian, China

Weiheng Zheng <sup>1,2</sup>, Feng Cai <sup>2,\*</sup>, Shenliang Chen <sup>1,\*</sup>, Jun Zhu <sup>2</sup>, Hongshuai Qi <sup>2</sup>, Shaohua Zhao <sup>2</sup> and Jianhui Liu <sup>2</sup>

<sup>1</sup> State Key Laboratory of Estuarine and Coastal Research, East China Normal University, Shanghai 200241, China; zhengweiheng@tio.org.cn (W.Z.)

<sup>2</sup> Third Institute of Oceanography, Ministry of Natural Resources, Xiamen 361005, China; junzhu@tio.org.cn (J.Z.); janka9960@163.com (H.Q.); zsh55228@126.com (S.Z.); liujianhuiirc@126.com (J.L.)

\* Correspondence: slchen@sklec.ecnu.edu.cn (S.C.); fcail800@126.com (F.C.).

Received: 14 February 2020; Accepted: 21 March 2020; Published: date

The supplemental information includes 2 parts.

Part 1: the original government data which is used in the calculation of EF

Part 2: data sources, including remote sensing data download URLs, the data sources and some calculation methods of data in Part 1.

### Part 1: Data

**Table S1.** Population and industrial output value of Fuzhou and Pingtan.

|                                       | Fuzhou  |         | Pingtan |        |
|---------------------------------------|---------|---------|---------|--------|
|                                       | 2014    | 2016    | 2014    | 2016   |
| Population                            | 6749436 | 6870648 | 427938  | 437812 |
| Industrial output value (billion CNY) | 749.53  | 841.96  | 3.38    | 2.98   |

**Table S2.** Yield, import and convert coefficient

| Items        | Yield (Pingtan) (unit: t) |       | Import (Fuzhou) (unit: t) |            | Convert Coefficient |
|--------------|---------------------------|-------|---------------------------|------------|---------------------|
|              | 2014                      | 2016  | 2014                      | 2016       |                     |
| Rice         | 84                        | 82    | 30337.729                 | 950702.699 | 2.744               |
| Sweet potato | 19265                     | 20084 |                           |            | 12.607              |
| Potato       | 1353                      | 1541  |                           |            | 12.607              |
| Coarse grain | 99                        | 109   | 4761.514                  | 192128.419 | 2.744               |
| Wheat        | 0                         | 0     | 5016.647                  | 159480.736 | 2.744               |
| Soybean      | 117                       | 138   |                           |            | 1.856               |
| Beans        | 267                       | 297   |                           |            | 1.856               |
| Vegetable    | 62033                     | 66448 |                           |            | 18                  |

|                           |        |         |            |             |       |
|---------------------------|--------|---------|------------|-------------|-------|
| <b>Oil crops (peanut)</b> | 8168   | 8277    | 9899.637   | 740141.546  | 1.856 |
| <b>Pork</b>               | 13593  | 14557   | 31289.634  | 24071.755   | 0.74  |
| <b>Poultry</b>            | 390    | 715     | 2998.615   | 54323.744   | 0.606 |
| <b>Dairy*</b>             | 0      | 0       | 5854.19184 |             | 0.502 |
| <b>Beef</b>               | 36     | 40      | 741.635    | 1034.481    | 0.074 |
| <b>Mutton</b>             | 348    | 321     | 275.463    | 778.538     | 0.074 |
| <b>Rabbit meat</b>        | 82     | 82      |            |             | 0.074 |
| <b>Eggs</b>               | 5990   | 9292    | 6966.767   | 6744.685    | 0.48  |
| <b>Wood*</b>              | 3960.6 | 3610.08 | 10233.965  | 59196.165   | 7.8   |
| <b>Fruits*</b>            | 3659   | 3442    | 17909.2053 | 19889.79916 | 3.5   |

\*Calculation measures of wood and fruit import are different from others (please see data sources below), and the results are put in this table.

**Table S3.** Aquatic products yield (unit: t) and convert coefficient

| Items             | Freshwater-Cultured |      | Convert Coefficient | Mariculture |        | Convert Coefficient | Marine Capture |        | Convert Coefficient |
|-------------------|---------------------|------|---------------------|-------------|--------|---------------------|----------------|--------|---------------------|
|                   | 2014                | 2016 |                     | 2014        | 2016   |                     | 2014           | 2016   |                     |
| Fish              | 135                 | 132  | 3.264               | 12504       | 16865  | 7.477               | 210400         | 133462 | 0.748               |
| Shell             | 0                   | 0    | 3.264               | 158786      | 181102 | 7.477               | 158866         | 70     | 0.748               |
| Shrimps and crabs | 55                  | 57   | 3.264               | 480         | 1492   | 7.477               | 16453          | 14533  | 0.748               |
| Alga              | 0                   | 0    | 3.264               | 37090       | 46809  | 7.477               | 37090          | 46809  | 0.748               |

**Table S4.** Consumption of energy sources\*

| Items         | 2014 (unit: t) | 2016 (unit: t) | Average Global Energy Footprint (unit: GJ/hm2)*** | Convert Coefficient (unit: GJ/t) |
|---------------|----------------|----------------|---------------------------------------------------|----------------------------------|
| Electricity** | 608.39         | 794.27         | 1000                                              |                                  |
| Gasoline      | 4722.612836    | 7912.575024    | 93                                                | 43.12                            |
| Coal          | 101170.5398    | 53188.09181    | 55                                                | 20.93                            |
| Diesel        | 35406.08395    | 40393.46207    | 93                                                | 42.71                            |
| Gas           | 11268.63947    | 11594.60491    | 71                                                | 52.2                             |
| Kerosene      | 0.762180836    | 2.402319434    | 93                                                | 43.12                            |
| Biomass fuel  | 91.02232925    | 120.0869348    | 55                                                | 20.93                            |
| Fuel oil      | 97.72796946    | 18.44923605    | 71                                                | 50.2                             |

\* Calculation measures please see data sources below, and the results are put in this table.

\*\* The unit of Electricity consumption is million kwh.

\*\*\* Wackernagel, M, Ree W E. (1996). Our ecological footprint: Reducing human impact on earth. Gabriela Island, B. C. Canada: New Society Publishers.

## Part 2: Data Sources

### 1. Remote sensing data download URLs

The image of 2004:

[http://bjdl.gscloud.cn/download?sid=uwfm2yomKVyjeNYPSO2BunEdGsgFhaXTo7x\\_cz9yzcDBKVobXkxvyw8EcRB6-mG79CYhKSWWF2m5o8W4FDqb5QOVbjlMBB9A3xct3W0eP1JOqDaeUD5MFXP\\_naQh5BrEmp8](http://bjdl.gscloud.cn/download?sid=uwfm2yomKVyjeNYPSO2BunEdGsgFhaXTo7x_cz9yzcDBKVobXkxvyw8EcRB6-mG79CYhKSWWF2m5o8W4FDqb5QOVbjlMBB9A3xct3W0eP1JOqDaeUD5MFXP_naQh5BrEmp8)

The image of 2014:

[http://bjdl.gcloud.cn/download?sid=e1xOsDGt\\_tepxrM1FKMTZeXCgNYIyaW9cLqBjctcMxk99xOTzAHhV7C1qdWRFWsq1USRmtytA-l5cDpntPmm91RV1umUcyp1mUrIbmU1aJrG7NWY4n5KM89yBMTDTFafX4s](http://bjdl.gcloud.cn/download?sid=e1xOsDGt_tepxrM1FKMTZeXCgNYIyaW9cLqBjctcMxk99xOTzAHhV7C1qdWRFWsq1USRmtytA-l5cDpntPmm91RV1umUcyp1mUrIbmU1aJrG7NWY4n5KM89yBMTDTFafX4s)

### The image of 2017:

[http://bjdl.gcloud.cn/download?sid=OF8MSmgmoifog5nk2YgaRFBBDhDgO72ipN80Ek1v-yZ9qpb41o3QYLOPALYvEPmT7eh0jroEJPCaO5Le8dJ4cnICBqnHJJaagRcbGRmPjp2uLnxEbtudAQr4\\_1YkqW5HrR6Y](http://bjdl.gcloud.cn/download?sid=OF8MSmgmoifog5nk2YgaRFBBDhDgO72ipN80Ek1v-yZ9qpb41o3QYLOPALYvEPmT7eh0jroEJPCaO5Le8dJ4cnICBqnHJJaagRcbGRmPjp2uLnxEbtudAQr4_1YkqW5HrR6Y)

## 2. Data sources and calculation methods of data in Part 1

**Table S5.** Data sources and calculation methods

| Items                                 | Data Sources                                                                                                                                                                                                                                                                                                                                                                                                                                                                                     |
|---------------------------------------|--------------------------------------------------------------------------------------------------------------------------------------------------------------------------------------------------------------------------------------------------------------------------------------------------------------------------------------------------------------------------------------------------------------------------------------------------------------------------------------------------|
| Population                            | Pingtang Statistical Yearbook                                                                                                                                                                                                                                                                                                                                                                                                                                                                    |
| Pork                                  | Pingtang Statistical Yearbook                                                                                                                                                                                                                                                                                                                                                                                                                                                                    |
| Poultry                               | Pingtang Statistical Yearbook                                                                                                                                                                                                                                                                                                                                                                                                                                                                    |
| Beef                                  | Pingtang Statistical Yearbook                                                                                                                                                                                                                                                                                                                                                                                                                                                                    |
| Mutton                                | Pingtang Statistical Yearbook                                                                                                                                                                                                                                                                                                                                                                                                                                                                    |
| Rabbit meat                           | Pingtang Statistical Yearbook                                                                                                                                                                                                                                                                                                                                                                                                                                                                    |
| Dairy                                 | Fujian Statistical Yearbook                                                                                                                                                                                                                                                                                                                                                                                                                                                                      |
| Aquatic products                      | Pingtang Statistical Yearbook                                                                                                                                                                                                                                                                                                                                                                                                                                                                    |
| Fruit import                          | Fujian Statistical Yearbook                                                                                                                                                                                                                                                                                                                                                                                                                                                                      |
| Wood usage                            | Wood usage = Area × density<br>Area comes from Pingtang Statistical Yearbook, and density is 920kg/m <sup>3</sup> .                                                                                                                                                                                                                                                                                                                                                                              |
| Wood import                           | Wood import = construction usage × area<br>Construction usage = 0.035m <sup>3</sup> /m <sup>2</sup> ( <a href="http://www.zlaqw.com/">http://www.zlaqw.com/</a> ), area comes from Pingtang Statistical Yearbook                                                                                                                                                                                                                                                                                 |
| Agricultural products and meat import | Agricultural products and meat import = import of Fuzhou × (Pingtang population / Fuzhou Population)<br>Import of Fuzhou and Fuzhou population comes from Fuzhou Statistical Yearbook, and Pingtang population comes from Pingtang Statistical Yearbook.                                                                                                                                                                                                                                         |
| Rate of industrial output value       | Rate of industrial output value = industrial output value of Pingtang / industrial output value of Fuzhou<br>Industrial output value of Pingtang comes from Pingtang Statistical Yearbook, and industrial output value of Fuzhou comes from Fuzhou Statistical Yearbook                                                                                                                                                                                                                          |
| Electricity consumption               | Pingtang Statistical Yearbook                                                                                                                                                                                                                                                                                                                                                                                                                                                                    |
| Gasoline consumption                  | Gasoline consumption = Car consumption + industrial gasoline consumption<br>Car consumption = (Number of car + Number of motorcycle) × Annual consumption<br>Industrial gasoline consumption = industrial gasoline consumption of Fuzhou × Rate of industrial output value<br>Industrial gasoline consumption of Fuzhou comes from Fuzhou Statistical Yearbook. Number of car, number of motorcycle and annual consumption were calculated from data of 2013 and 2018 via interpolation method.* |
| Diesel consumption                    | Diesel consumption = Farm machinery consumption + industrial diesel consumption<br>Industrial diesel consumption = industrial diesel consumption of Fuzhou × Rate of industrial output value                                                                                                                                                                                                                                                                                                     |
| Other energy consumption              | Other energy consumption = energy consumption of Fuzhou × Rate of industrial output value                                                                                                                                                                                                                                                                                                                                                                                                        |
| Convert coefficient                   | Cultivated land<br>Global average yield (Shoufeng Qiu, 2009)**                                                                                                                                                                                                                                                                                                                                                                                                                                   |
|                                       | Forest land<br>Global average yield (Shoufeng Qiu, 2009)**                                                                                                                                                                                                                                                                                                                                                                                                                                       |
|                                       | grassland<br>Global average yield (Shoufeng Qiu, 2009)**                                                                                                                                                                                                                                                                                                                                                                                                                                         |
|                                       | Water area and sea area<br>Convert coefficient of Marine capture yield = 10% × Convert coefficient of mariculture yield<br>Convert coefficient of freshwater-cultured yield and mariculture yield comes from Hongyu Xie and Huishan Ye (2008)***                                                                                                                                                                                                                                                 |

|                                                                                                                                                                                                                             |                                             |
|-----------------------------------------------------------------------------------------------------------------------------------------------------------------------------------------------------------------------------|---------------------------------------------|
| Constructi<br>on land                                                                                                                                                                                                       | Global average yield (Shoufeng Qiu, 2009)** |
| * Data of 2018: <a href="http://www.pingtan.gov.cn/jhtml/ct/ct_2971_80481">http://www.pingtan.gov.cn/jhtml/ct/ct_2971_80481</a>                                                                                             |                                             |
| Data of 2013: <a href="http://www.pingtan.gov.cn/jhtml/ct/ct_2971_38275">http://www.pingtan.gov.cn/jhtml/ct/ct_2971_38275</a>                                                                                               |                                             |
| ** Shoufeng Qiu (2009). "Ecological footprint and ecological carrying capacity of Fujian Province in 2008" Development Research, (12): 80-83. (in Chinese)                                                                  |                                             |
| ***Hongyu Xie, Huishan Ye (2008) "Struggling with social-ecological mismatches in marine management and conservation at Easter Island." Journal of Guangzhou University (Natural Science Edition), 7(1):76-80. (in Chinese) |                                             |

### Some screenshots of yearbook:

2-2-2 各类粮食产量(9)

单位:吨

| 项 目    | 2012 年 | 2013 年 | 2014 年 | 2015 年 | 2016 年 |
|--------|--------|--------|--------|--------|--------|
| 总 计    | 20781  | 20056  | 21185  | 21384  | 22251  |
| 按收获季节分 |        |        |        |        |        |
| 春收粮食   | 1477   | 1476   | 1440   | 1555   | 1679   |
| 夏收粮食   | 422    | 480    | 480    | 504    | 406    |
| 秋收粮食   | 18882  | 18100  | 19265  | 19325  | 20166  |
| 按品种分   |        |        |        |        |        |
| 稻 谷    | 91     | 87     | 84     | 83     | 82     |
| 早 稻    | 91     | 87     | 84     | 83     | 82     |
| 晚 稻    | -      | -      | -      | -      | -      |
| 大小麦    | 6      | -      | -      | -      | -      |
| #小 麦   | 6      | -      | -      | -      | -      |
| 甘 薯    | 18829  | 18100  | 19265  | 19414  | 20084  |
| 马铃薯    | 1450   | 1374   | 1353   | 1470   | 1541   |
| 杂 粮    | 55     | 117    | 99     | 88     | 109    |
| 大 豆    | 119    | 122    | 117    | 117    | 138    |
| 杂 豆    | 231    | 256    | 267    | 212    | 297    |

**Figure S1** Grain yield in 2014 and 2016.

The red parts are grain yield in 2014 and 2016 (unit: t).

The numbers from top to bottom are yield of total, grain harvested in spring, grain harvested in summer, grain harvested in autumn, rice, early season rice, late rice, barley and wheat, wheat, sweet potato, potato, coarse grain, soybean, and beans.

| 2-2-2 经济作物与其他作物产量(10) |        |        |        |        |        |
|-----------------------|--------|--------|--------|--------|--------|
| 单位:吨                  |        |        |        |        |        |
| 项 目                   | 2012 年 | 2013 年 | 2014 年 | 2015 年 | 2016 年 |
| 1. 油料作物               | 8741   | 8245   | 8168   | 8149   | 8277   |
| #花生                   | 8741   | 8245   | 8168   | 8149   | 8277   |
| 2. 其他农作物              |        |        |        |        |        |
| 蔬菜                    | 64098  | 61901  | 61379  | 62794  | 65610  |
| 瓜果类                   | 1654   | 1788   | 2069   | 2024   | 2297   |
| #西瓜                   | 1297   | 1365   | 1415   | 1195   | 1459   |
| 3. 花卉                 | 57     | 57     | 57     | 57     | 60     |
| #水仙花                  | 25     | 42     | 43     | 43     | 50     |

  

| 2-2-2 水果产量(11) |        |        |        |        |        |
|----------------|--------|--------|--------|--------|--------|
| 单位:吨           |        |        |        |        |        |
| 项 目            | 2012 年 | 2013 年 | 2014 年 | 2015 年 | 2016 年 |
| 合 计            | 2162   | 2382   | 2244   | 2324   | 1983   |
| 柑 桔            | 590    | 590    | 30     | 27     | 27     |
| 桔 橙            | 637    | 637    | 59     | 62     | 157    |
| 龙眼             |        | 1082   | 1828   | 1883   | 1600   |
| 枇杷             |        | 37     | 50     | 55     | 55     |
| 菠萝             | -      | -      | 6      | 5      | 33     |
| 杨梅             | -      | -      | -      | -      | -      |
| 其他             | -      | -      | -      | 2      | 1      |
| 荔枝             | -      | -      | -      | 117    | 106    |
| 葡萄             | -      | -      | -      | -      | -      |
| 其他             | -      | -      | -      | -      | -      |

**Figure S2.** Yield of crop and fruits in 2014 and 2016.

The red parts in Table 2-2-2 (10) are crop yield in 2014 and 2016 (unit: t).

The numbers from top to bottom are yield of oil crops, peanut, vegetable, amphisarca, watermelon, flowers, and narcissus.

The red parts in Table 2-2-2 (11) are yield of fruits in 2014 and 2016 (unit: t).

The numbers from top to bottom are yield of total, citrus reticulata, tangerine, citrus junos, longan, loquat, pineapple, waxberry, other, litchi, and grape.
